CORRECTION

# Correction: Is Working Risky or Protective for Married Adolescent Girls in Urban Slums in Kenya? Understanding the Association between Working Status, Savings and Intimate-Partner Violence

Eunice Muthengi, Tabitha Gitau, Karen Austrian

There is an error in Table 4. The value listed for “Work + Regular Saving” under “Model 2” should be “0.382–6.623”. Please see the corrected [Table 4](#) here.

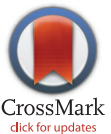

 OPEN ACCESS

**Citation:** Muthengi E, Gitau T, Austrian K (2016) Correction: Is Working Risky or Protective for Married Adolescent Girls in Urban Slums in Kenya? Understanding the Association between Working Status, Savings and Intimate-Partner Violence. PLoS ONE 11(6): e0158250. doi:10.1371/journal.pone.0158250

**Published:** June 22, 2016

**Copyright:** © 2016 Muthengi et al. This is an open access article distributed under the terms of the [Creative Commons Attribution License](#), which permits unrestricted use, distribution, and reproduction in any medium, provided the original author and source are credited.

**Table 4. Multivariate Logistic Regression Results Predicting Experience of Physical Violence in the Previous Six Months, Married Girls, Age 15–19 (N = 445).**

|                                                  | Model 1: Original Model |             | Model 2: Work Status and Saving Status Interaction |             | Model 3: High/Low Work Income and Saving Interaction |             |
|--------------------------------------------------|-------------------------|-------------|----------------------------------------------------|-------------|------------------------------------------------------|-------------|
|                                                  | OR                      | [95% CI]    | OR                                                 | [95% CI]    | OR                                                   | [95% CI]    |
| <b>Age (Ref = 15–17):</b>                        |                         |             |                                                    |             |                                                      |             |
| 18                                               | 0.555                   | 0.215–1.434 | 0.567                                              | 0.219–1.467 | 0.567                                                | 0.219–1.468 |
| 19                                               | 0.644                   | 0.348–1.190 | 0.680                                              | 0.372–1.240 | 0.642                                                | 0.323–1.277 |
| <b>Education (Ref = Some Primary):</b>           |                         |             |                                                    |             |                                                      |             |
| Primary complete                                 | 0.400*                  | 0.205–0.783 | 0.407*                                             | 0.219–0.756 | 0.398*                                               | 0.207–0.767 |
| Some secondary                                   | 0.444†                  | 0.173–1.139 | 0.452†                                             | 0.173–1.181 | 0.439†                                               | 0.171–1.125 |
| Secondary complete                               | 0.209**                 | 0.077–0.573 | 0.214**                                            | 0.087–0.529 | 0.204*                                               | 0.073–0.575 |
| <b>Religion (Ref = Catholic):</b>                |                         |             |                                                    |             |                                                      |             |
| Protestant/Other                                 | 0.906                   | 0.555–1.477 | 0.891                                              | 0.566–1.401 | 0.925                                                | 0.582–1.470 |
| <b>Owns Jewelry</b>                              | 0.549*                  | 0.339–0.890 | 0.560*                                             | 0.347–0.902 | 0.564*                                               | 0.351–0.906 |
| <b>Worked (Ref = No):</b>                        |                         |             |                                                    |             |                                                      |             |
| Yes                                              | 1.876**                 | 1.356–2.596 |                                                    |             |                                                      |             |
| <b>Saved Regularly (Ref = No):</b>               |                         |             |                                                    |             |                                                      |             |
| Yes                                              | 1.509                   | 0.374–6.084 |                                                    |             |                                                      |             |
| <b>Work &amp; Saving (Ref = No Work):</b>        |                         |             |                                                    |             |                                                      |             |
| Work + No Regular Saving                         |                         |             | 1.959**                                            | 1.410–2.721 |                                                      |             |
| Work + Regular Saving                            |                         |             | 1.590                                              | 0.382–6.623 |                                                      |             |
| <b>Work Income &amp; Saving (Ref = No Work)</b>  |                         |             |                                                    |             |                                                      |             |
| Lower Income <sup>a</sup> + No Regular Saving    |                         |             |                                                    |             | 1.505                                                | 0.865–2.618 |
| Higher Income <sup>a</sup> + No Regular Saving   |                         |             |                                                    |             | 2.640*                                               | 1.302–5.354 |
| Work + Regular Saving                            |                         |             |                                                    |             | 1.613                                                | 0.389–6.689 |
| <b>Partner Trusts Her with Money (Ref = N</b>    |                         |             |                                                    |             |                                                      |             |
| Yes                                              | 0.365*                  | 0.158–0.841 | 0.367*                                             | 0.152–0.887 | 0.377*                                               | 0.149–0.953 |
| <b>Husband's Age</b>                             | 1.038                   | 0.882–1.223 | 1.040                                              | 0.894–1.210 | 1.045                                                | 0.900–1.123 |
| <b>Husband Worked in Past Month: (Ref = No):</b> |                         |             |                                                    |             |                                                      |             |
| Yes                                              | 1.022                   | 0.427–2.447 | 0.946                                              | 0.404–2.213 | 0.983                                                | 0.420–2.302 |
| <b>Number of Children: (Ref = None):</b>         |                         |             |                                                    |             |                                                      |             |

(Continued)

Table 4. (Continued)

|    | Model 1: Original Model |             | Model 2: Work Status and Saving Status Interaction |             | Model 3: High/Low Work Income and Saving Interaction |             |
|----|-------------------------|-------------|----------------------------------------------------|-------------|------------------------------------------------------|-------------|
|    | OR                      | [95% CI]    | OR                                                 | [95% CI]    | OR                                                   | [95% CI]    |
| 1  | 1.587                   | 0.503–5.009 | 1.587                                              | 0.522–4.824 | 1.635                                                | 0.531–5.037 |
| 2+ | 2.027                   | 0.637–6.449 | 2.000                                              | 0.672–5.954 | 2.052                                                | 0.648–6.501 |

\*\*p < .01;

\*p < .05;

†<0.10

<sup>a</sup> Lower income is defined as less than the median income of 3,001 KES (USD 35.4) and higher income is equal to or greater than this amount.

doi:10.1371/journal.pone.0158250.t001

## Reference

1. Muthengi E, Gitau T, Austrian K (2016) Is Working Risky or Protective for Married Adolescent Girls in Urban Slums in Kenya? Understanding the Association between Working Status, Savings and Intimate-Partner Violence. PLoS ONE 11(5): e0155988. doi: [10.1371/journal.pone.0155988](https://doi.org/10.1371/journal.pone.0155988) PMID: [27232997](https://pubmed.ncbi.nlm.nih.gov/27232997/)
